# Supplementary figures and images for: Population Dynamics in Italian Canids between the Late Pleistocene and Bronze Age
Source: MDPI journal article supplement (doi:10.3390/genes11121409), 2020-11-26

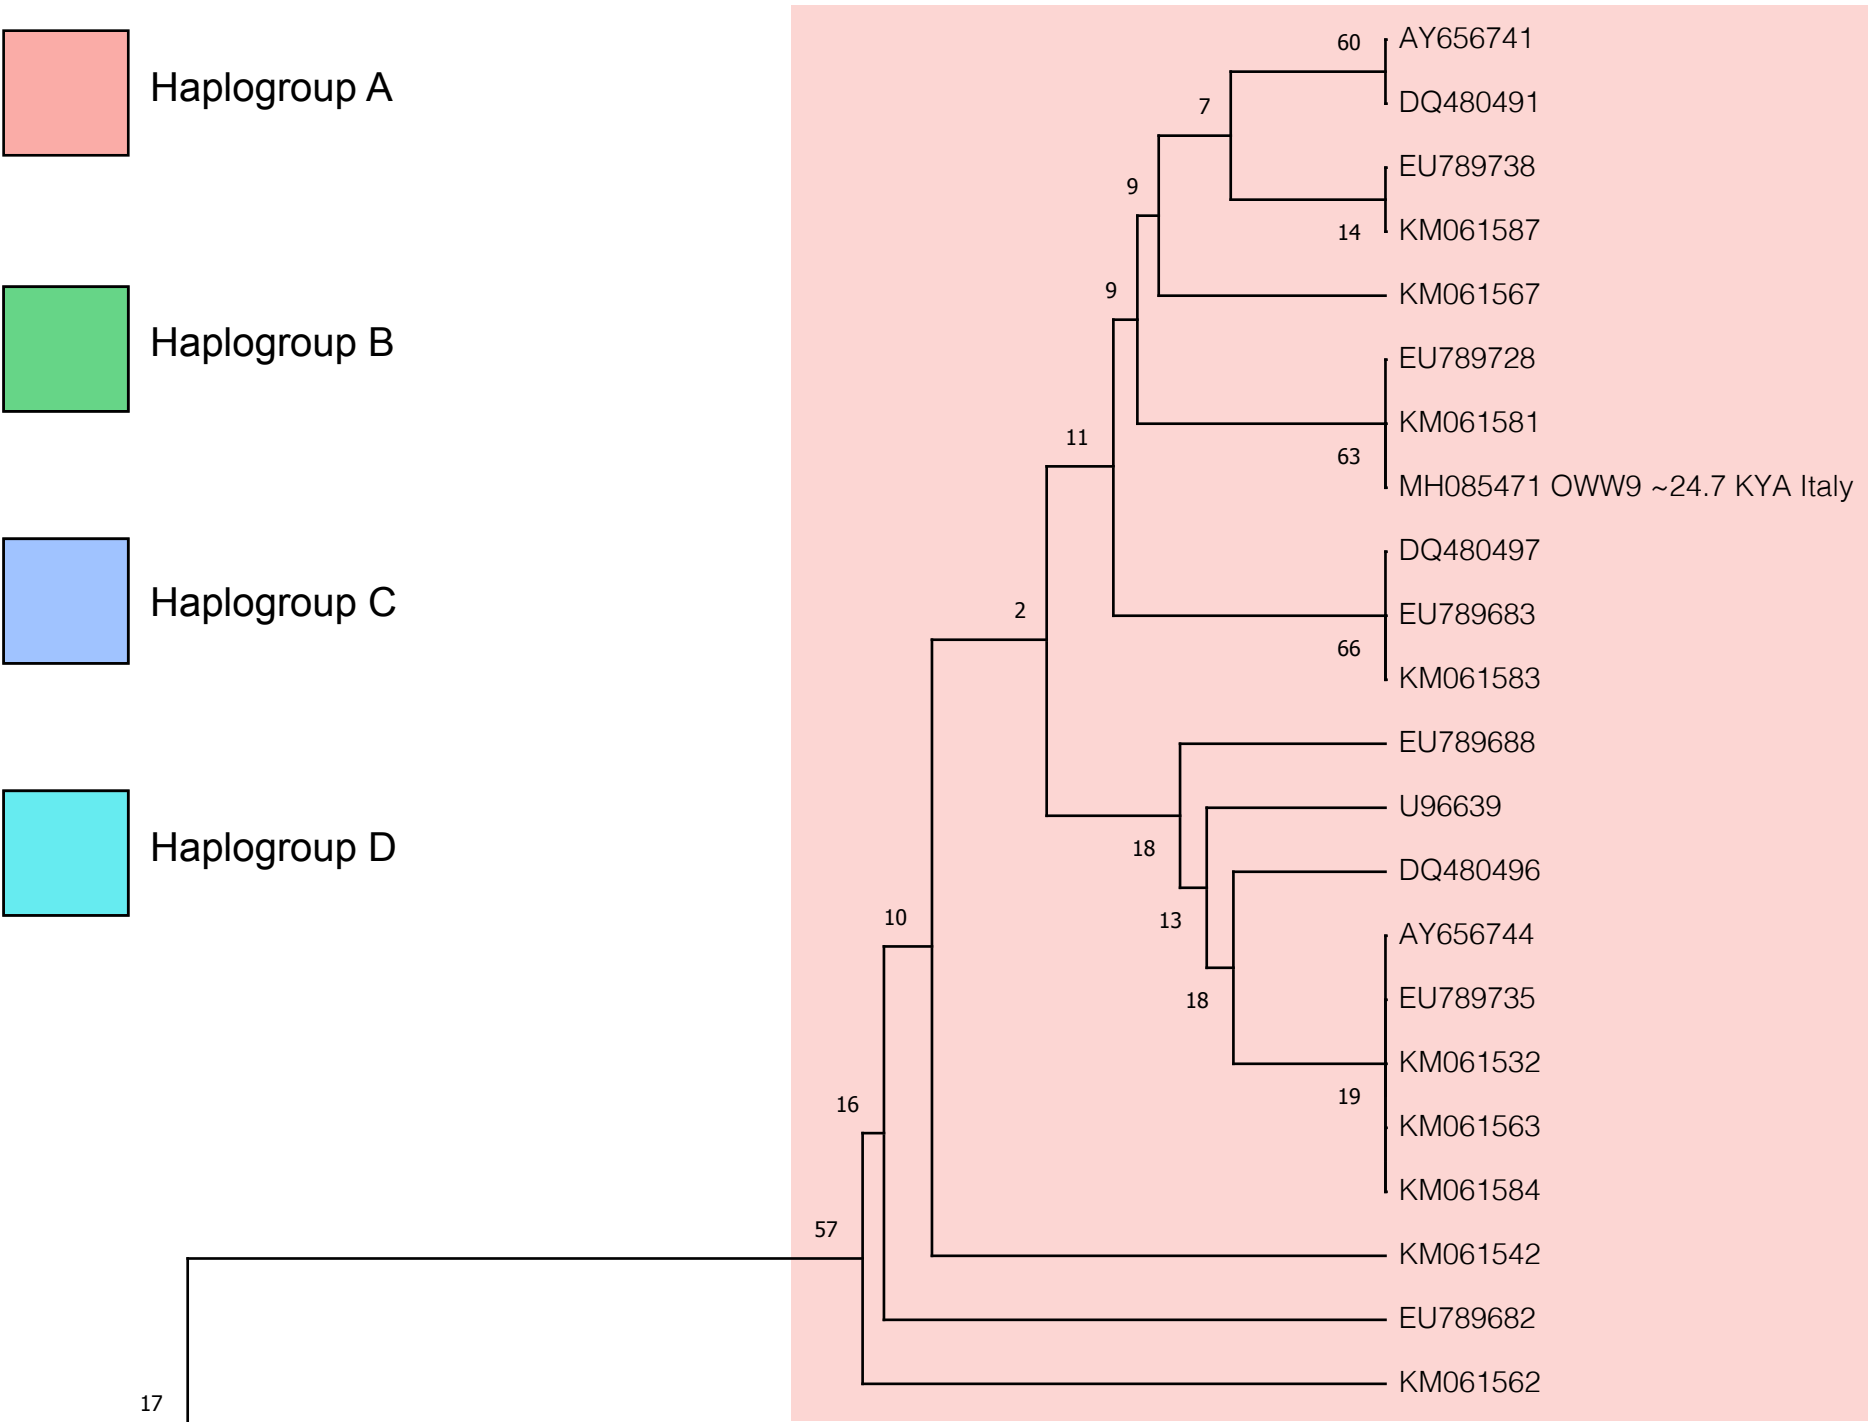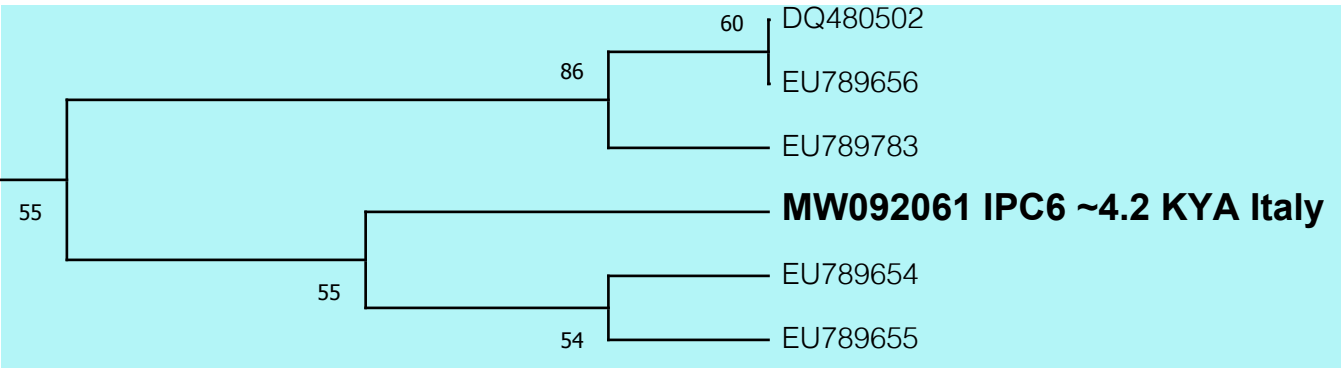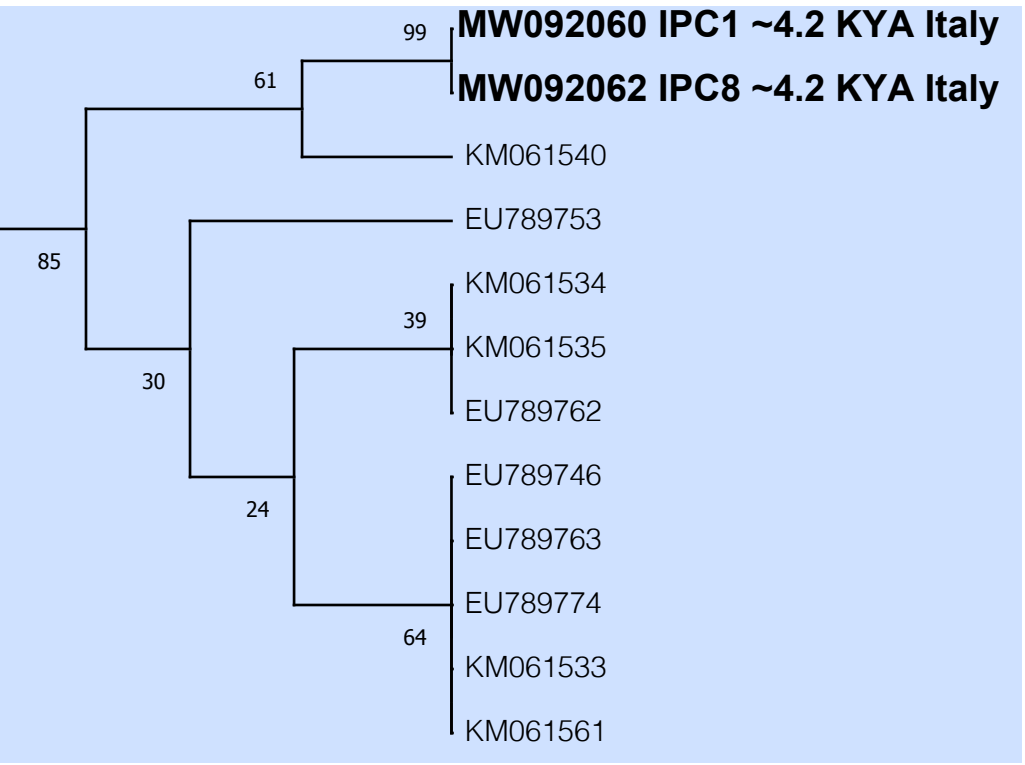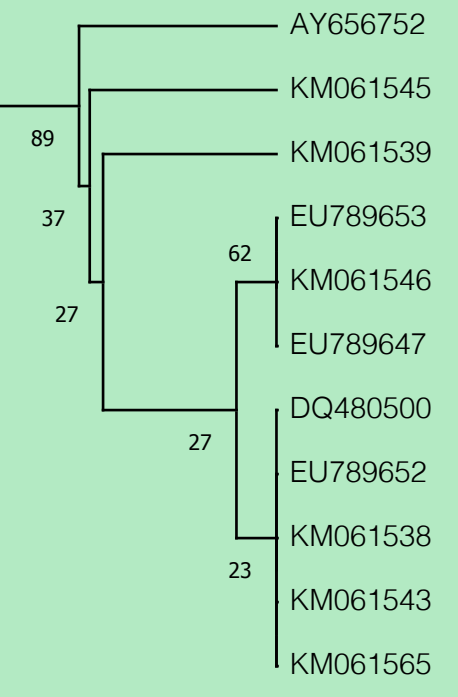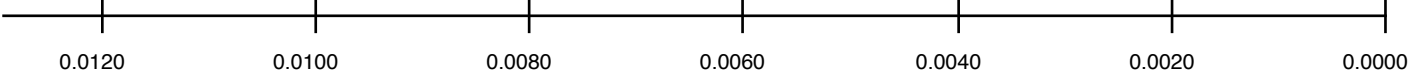

Supplement: s1 [file s1]

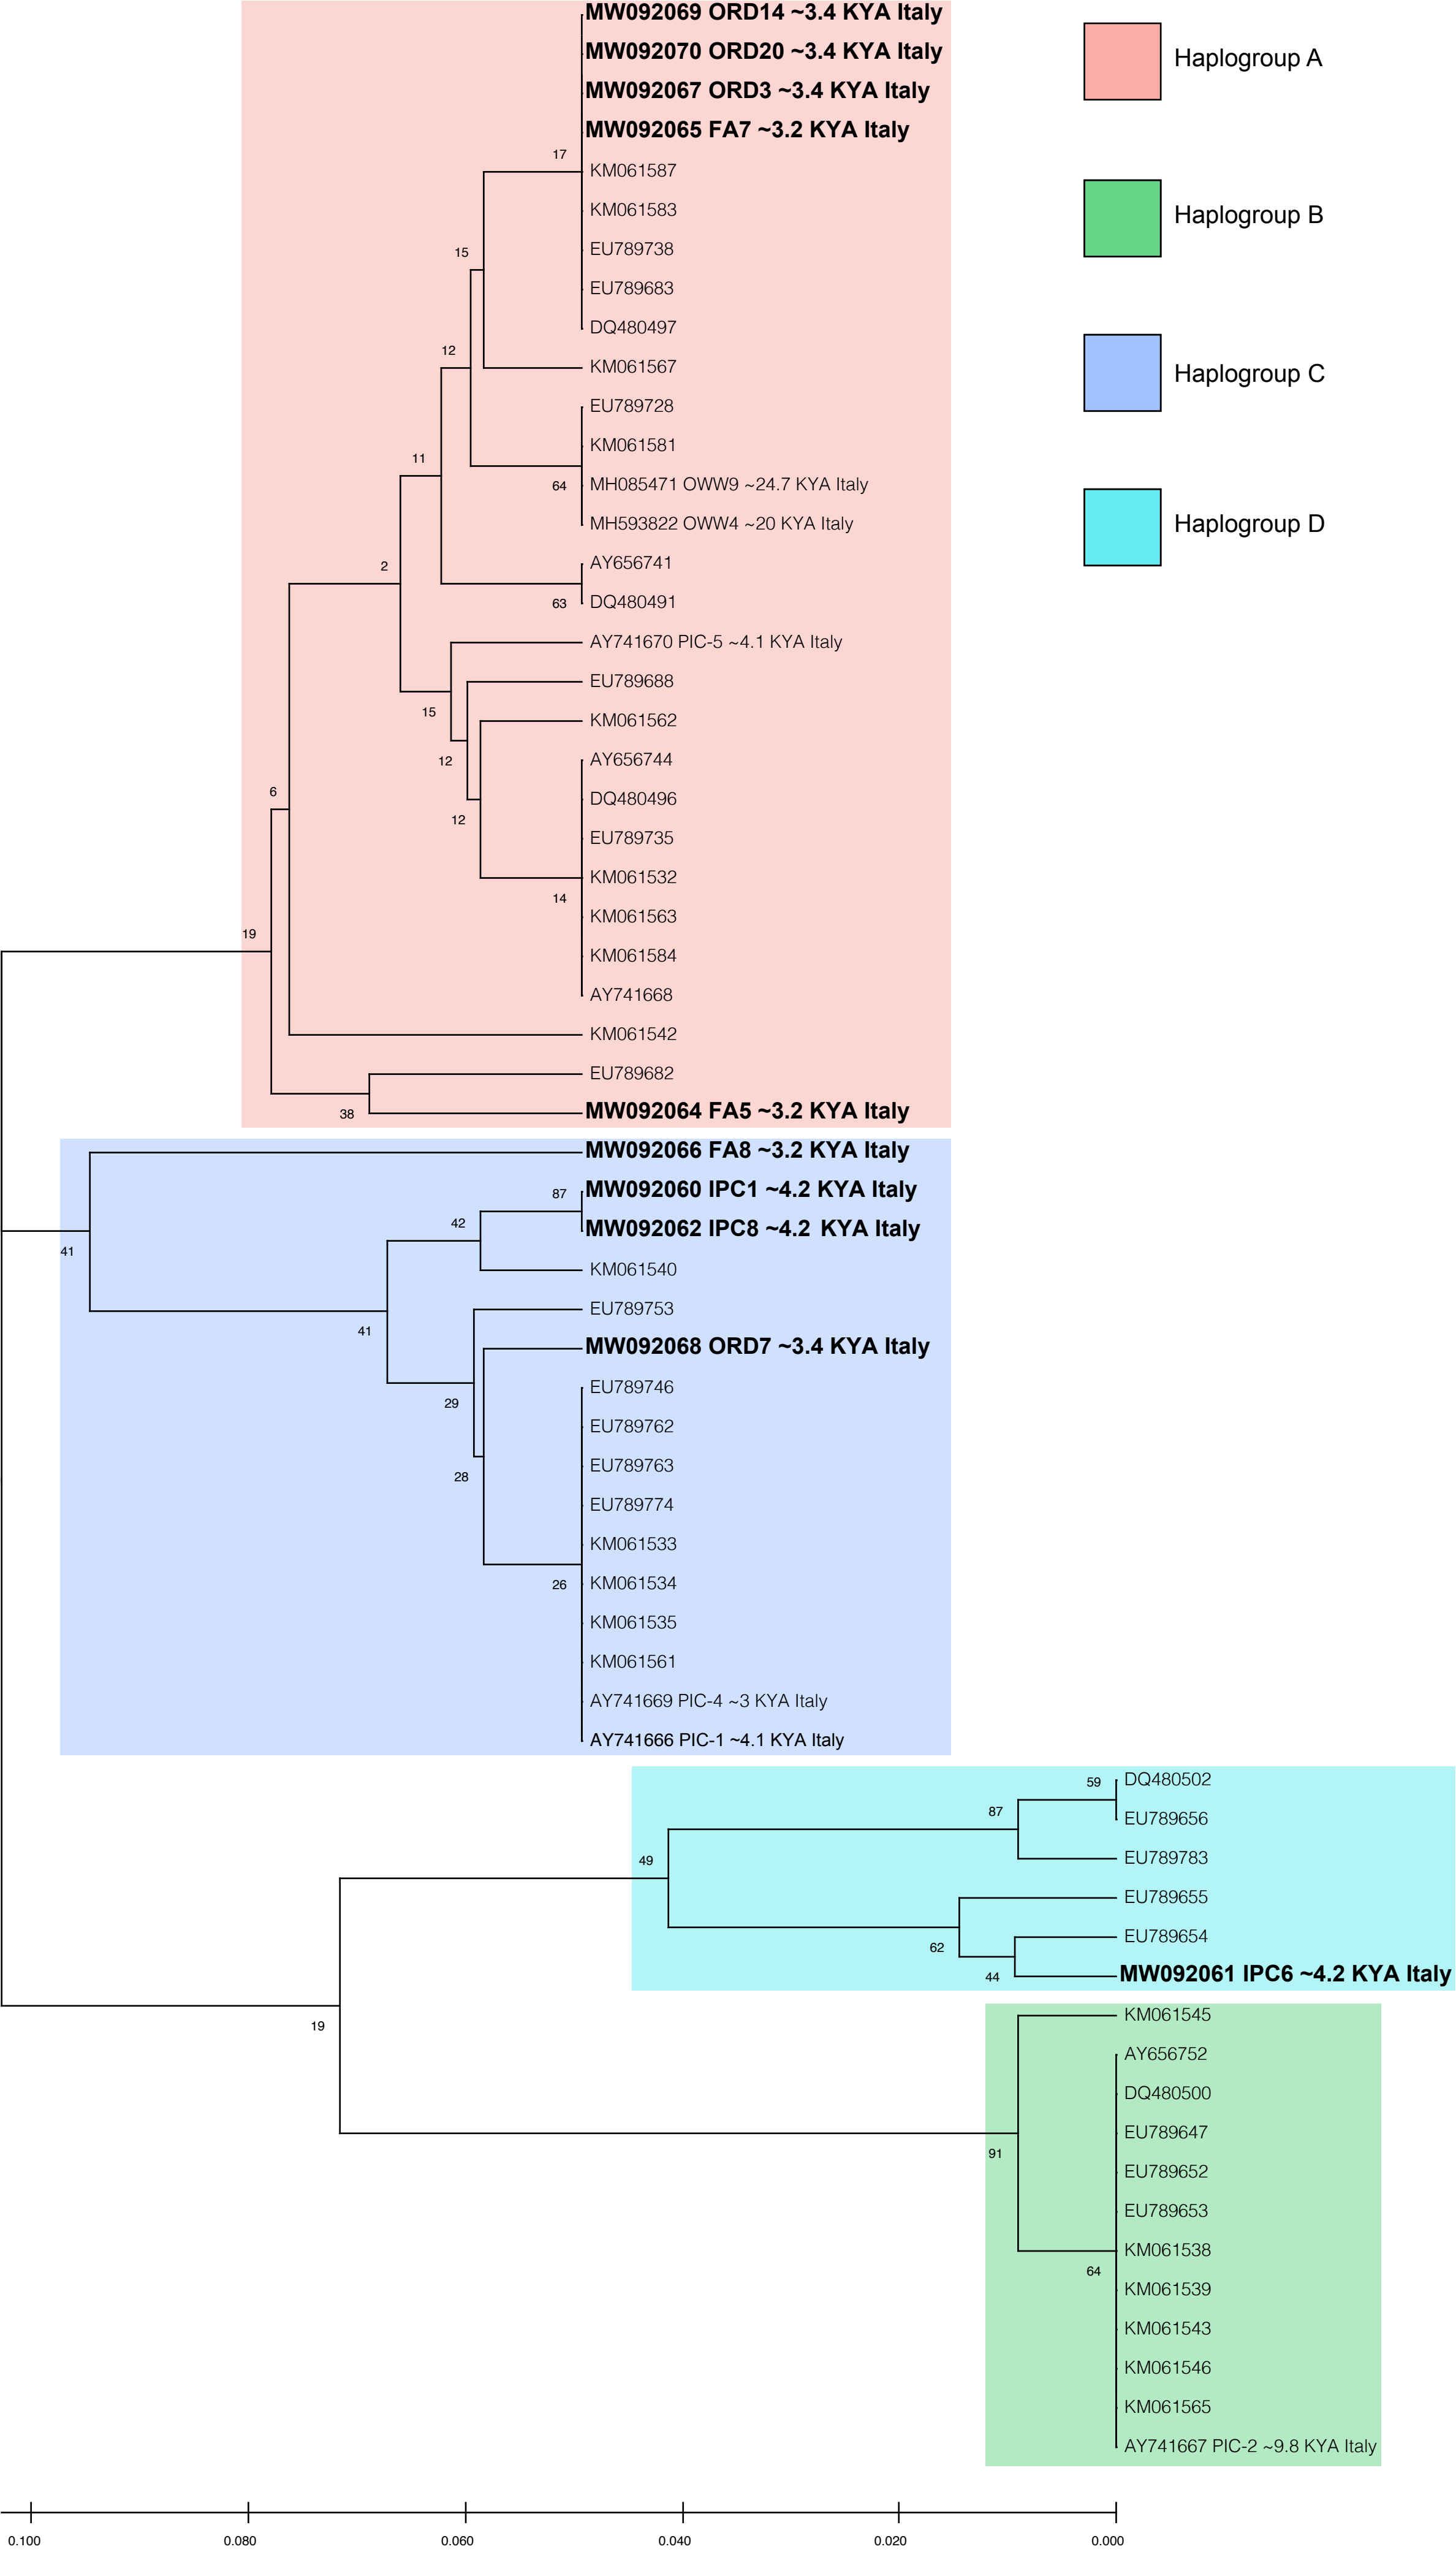

Supplement: s1 [file s1]
